# Supplementary material for: Large-Scale Analysis Reveals Gene Signature for Survival Prediction in Primary Glioblastoma
Source: PubMed Central journal article supplement (PMC7541357; doi:10.1007/s12035-020-02088-w), 2020-09-01
Supplement: 12035_2020_2088_MOESM1_ESM.pdf [file 12035_2020_2088_MOESM1_ESM.pdf]

## Large scale analysis reveals gene signature for survival prediction in primary glioblastoma

Birbal Prasad<sup>1</sup>, Yongji Tian<sup>2</sup> and Xinzhong Li<sup>1\*</sup>

<sup>1</sup>National Horizons Centre, School of Health and Life Sciences, Teesside University, Darlington, DL1 1HG, UK. Email: [B.Prasad@tees.ac.uk](mailto:B.Prasad@tees.ac.uk); [X.Li@tees.ac.uk](mailto:X.Li@tees.ac.uk)

<sup>2</sup>Beijing Tiantan Hospital, Capital Medical University, Beijing, 100070, P.R. China. Email: [tyjpumc@163.com](mailto:tyjpumc@163.com)

\*Correspondence: Email: [X.Li@tees.ac.uk](mailto:X.Li@tees.ac.uk), Phone: +44-01642738451

**Table S1:** Differentially expressed genes identified to be significantly associated to overall survival in TCGA RNA-seq primary GBM cohort using univariate Cox regression analysis. Proportional Hazards (PH).

| Entrez id | Symbol   | Coeff.     | P-value (Cox) | Pvalue (PH) | Cox score  |
|-----------|----------|------------|---------------|-------------|------------|
| 5799      | PTPRN2   | 0.45769272 | 0.00016514    | 0.31875768  | 14.3608838 |
| 5798      | PTPRN    | 0.23051635 | 0.00022437    | 0.28436601  | 13.7789477 |
| 29015     | SLC43A3  | 0.51903681 | 0.00026632    | 0.52829078  | 13.5783937 |
| 261729    | STEAP2   | 0.30419255 | 0.00055515    | 0.8214233   | 12.109393  |
| 3706      | ITPKA    | 0.38460537 | 0.00053507    | 0.85395322  | 11.9256858 |
| 10769     | PLK2     | 0.32511119 | 0.00090101    | 0.58467762  | 11.011755  |
| 9601      | PDIA4    | 0.44730502 | 0.00096047    | 0.24450891  | 10.8644232 |
| 55240     | STEAP3   | 0.24662399 | 0.00108345    | 0.48061731  | 10.768553  |
| 4192      | MDK      | 0.33032632 | 0.00121318    | 0.72814847  | 10.4298297 |
| 9645      | MICAL2   | 0.30685979 | 0.00139258    | 0.68104526  | 10.2084063 |
| 84557     | MAP1LC3A | 0.40067483 | 0.00171189    | 0.52861755  | 9.93126611 |
| 27122     | DKK3     | 0.36385562 | 0.00180981    | 0.56385622  | 9.76825228 |
| 79605     | PGBD5    | 0.34079112 | 0.00202848    | 0.59146914  | 9.51124832 |
| 10797     | MTHFD2   | -0.3774165 | 0.00202081    | 0.46644883  | 9.43567818 |
| 11014     | KDEL2    | 0.53284095 | 0.00202691    | 0.13156959  | 9.38511768 |
| 2896      | GRN      | 0.46351579 | 0.00241801    | 0.40077134  | 9.16626864 |
| 58516     | SINHCAF  | -0.2943193 | 0.00342146    | 0.37256291  | 8.62159549 |
| 3485      | IGFBP2   | 0.18438201 | 0.00384212    | 0.52078182  | 8.45500719 |
| 2990      | GUSB     | 0.42493186 | 0.00396909    | 0.78485689  | 8.32233912 |
| 66004     | LYNX1    | 0.28358166 | 0.00413864    | 0.2788438   | 8.2233959  |
| 23007     | PLCH1    | 0.31013741 | 0.00521866    | 0.44436013  | 7.87626581 |
| 81031     | SLC2A10  | 0.27970861 | 0.00541799    | 0.29006077  | 7.84615986 |
| 6938      | TCF12    | -0.3121634 | 0.00542033    | 0.09431318  | 7.75515793 |
| 4745      | NELL1    | 0.21232528 | 0.00604489    | 0.91631501  | 7.65867213 |
| 143888    | POGLUT3  | 0.30746599 | 0.00637759    | 0.18520193  | 7.47574223 |
| 5999      | RGS4     | 0.16830399 | 0.0068341     | 0.99730495  | 7.34184986 |
| 9956      | HS3ST2   | 0.18414994 | 0.00727977    | 0.48060938  | 7.25966823 |
| 5034      | P4HB     | 0.42476092 | 0.00772312    | 0.92209902  | 7.07072079 |
| 4478      | MSN      | 0.29421018 | 0.00841107    | 0.4549524   | 6.99769879 |
| 26240     | FAM50B   | 0.25321864 | 0.00857862    | 0.76639805  | 6.97853976 |
| 219738    | FAM241B  | 0.25518884 | 0.00835011    | 0.09278555  | 6.96027825 |
| 6804      | STX1A    | 0.2555039  | 0.00877121    | 0.96344354  | 6.852664   |

|           |          |            |            |            |            |
|-----------|----------|------------|------------|------------|------------|
| 80381     | CD276    | 0.38663391 | 0.00915067 | 0.81648296 | 6.79138202 |
| 202559    | KHDRBS2  | -0.2997335 | 0.01107306 | 0.99916708 | 6.70041247 |
| 84282     | RNF135   | 0.38939468 | 0.01084585 | 0.75388348 | 6.49201641 |
| 5058      | PAK1     | 0.36872538 | 0.0112301  | 0.35374711 | 6.40355783 |
| 54472     | TOLLIP   | 0.49701246 | 0.01183416 | 0.84295018 | 6.33231973 |
| 302       | ANXA2    | 0.21099156 | 0.01287264 | 0.17940874 | 6.22382455 |
| 51148     | CERCAM   | 0.32297366 | 0.01250339 | 0.05254425 | 6.22095766 |
| 23096     | IQSEC2   | 0.30706989 | 0.01279024 | 0.40052628 | 6.20918008 |
| 9369      | NRXN3    | 0.22570358 | 0.0130655  | 0.80364912 | 6.19675546 |
| 5954      | RCN1     | 0.37124776 | 0.01379168 | 0.29707222 | 6.07118974 |
| 2014      | EMP3     | 0.19011688 | 0.01462608 | 0.657461   | 6.04559508 |
| 23601     | CLEC5A   | 0.17870939 | 0.0150832  | 0.30899859 | 5.93406131 |
| 221424    | LRRC73   | 0.27498325 | 0.01468791 | 0.30027118 | 5.90973568 |
| 79057     | PRRG3    | 0.24308966 | 0.01591542 | 0.158364   | 5.88119729 |
| 25798     | BRI3     | 0.54008938 | 0.01554205 | 0.20645667 | 5.84723868 |
| 9737      | GPRASP1  | 0.23635813 | 0.01578771 | 0.39825386 | 5.8274776  |
| 57181     | SLC39A10 | -0.4249265 | 0.01657431 | 0.11245005 | 5.70389889 |
| 5782      | PTPN12   | 0.41269414 | 0.01686011 | 0.08253254 | 5.69309832 |
| 57535     | KIAA1324 | 0.27842097 | 0.01847005 | 0.81146019 | 5.58120434 |
| 158931    | TCEAL6   | 0.14958175 | 0.01859074 | 0.85502318 | 5.58017937 |
| 8534      | CHST1    | 0.21011452 | 0.0185762  | 0.22301047 | 5.54657891 |
| 2335      | FN1      | 0.18767955 | 0.01872407 | 0.62617105 | 5.52936656 |
| 8407      | TAGLN2   | 0.21181065 | 0.01999721 | 0.83925362 | 5.46419196 |
| 4313      | MMP2     | 0.19934009 | 0.01954602 | 0.618111   | 5.46373078 |
| 10627     | MYL12A   | 0.31334288 | 0.02016709 | 0.84080312 | 5.4139299  |
| 112609    | MRAP2    | 0.1615869  | 0.02040285 | 0.29024964 | 5.39894447 |
| 56666     | PANX2    | 0.2522143  | 0.02056659 | 0.48373764 | 5.36182212 |
| 100506311 | HOTAIRM1 | 0.14077947 | 0.02155084 | 0.20464281 | 5.31307058 |
| 400745    | SH2D5    | 0.23047712 | 0.02147096 | 0.75336884 | 5.30750782 |
| 158038    | LINGO2   | 0.3506936  | 0.02235499 | 0.80915713 | 5.3002967  |
| 3223      | HOXC6    | 0.18576427 | 0.02193853 | 0.24337413 | 5.28529598 |
| 6447      | SCG5     | 0.26594183 | 0.02148004 | 0.20311541 | 5.22364382 |
| 84918     | LRP11    | 0.3233582  | 0.02257705 | 0.13671302 | 5.20676735 |
| 55466     | DNAJA4   | 0.28480672 | 0.02253491 | 0.25778402 | 5.19810073 |
| 26470     | SEZ6L2   | 0.15312953 | 0.02391251 | 0.43719258 | 5.12969094 |
| 8714      | ABCC3    | 0.12393905 | 0.02377074 | 0.12005697 | 5.12723601 |
| 7079      | TIMP4    | -0.1503839 | 0.02400273 | 0.68394053 | 5.09956382 |
| 30061     | SLC40A1  | -0.2362434 | 0.02469517 | 0.61214006 | 5.0460199  |
| 142940    | TRUB1    | -0.3962722 | 0.02623315 | 0.48217419 | 4.93728199 |
| 121601    | ANO4     | 0.21503642 | 0.0268528  | 0.39928826 | 4.92920651 |
| 23122     | CLASP2   | -0.2589087 | 0.02689852 | 0.64949459 | 4.90613135 |
| 1475      | CSTA     | 0.1800176  | 0.02734029 | 0.6238541  | 4.89031603 |
| 6275      | S100A4   | 0.15988816 | 0.02704278 | 0.42663358 | 4.88830811 |

|        |           |            |            |            |            |
|--------|-----------|------------|------------|------------|------------|
| 7277   | TUBA4A    | 0.18676438 | 0.02753934 | 0.22754671 | 4.86238675 |
| 5577   | PRKAR2B   | 0.21779111 | 0.02775198 | 0.10257045 | 4.85524843 |
| 79772  | MCTP1     | 0.27967757 | 0.02786587 | 0.52599694 | 4.82804691 |
| 51330  | TNFRSF12A | 0.18328068 | 0.02821612 | 0.51482773 | 4.8219489  |
| 57095  | PITHD1    | 0.53719972 | 0.02860417 | 0.16363531 | 4.80969615 |
| 26049  | FAM169A   | -0.2631391 | 0.02919892 | 0.09956723 | 4.76092607 |
| 11332  | ACOT7     | 0.27029858 | 0.02971167 | 0.59388248 | 4.73183152 |
| 977    | CD151     | 0.24343262 | 0.03095754 | 0.39096314 | 4.67940186 |
| 9674   | KIAA0040  | 0.18747901 | 0.03090234 | 0.43779996 | 4.66237784 |
| 871    | SERPINH1  | 0.21372673 | 0.03154193 | 0.27509411 | 4.59983931 |
| 4828   | NMB       | -0.1556896 | 0.03229636 | 0.26362447 | 4.59448194 |
| 376267 | RAB15     | 0.24974554 | 0.03253551 | 0.55082613 | 4.57999411 |
| 54675  | CRLS1     | -0.4410457 | 0.03346914 | 0.32937045 | 4.53970039 |
| 195814 | SDR16C5   | 0.36345873 | 0.03415684 | 0.49141567 | 4.53476005 |
| 7045   | TGFBI     | 0.14176659 | 0.03335856 | 0.60416707 | 4.50612067 |
| 783    | CACNB2    | 0.21889763 | 0.03406593 | 0.90188261 | 4.49913719 |
| 3213   | HOXB3     | 0.12104934 | 0.03509082 | 0.8310725  | 4.46818162 |
| 57451  | TENM2     | 0.1628748  | 0.03532277 | 0.71309796 | 4.46727262 |
| 128434 | VSTM2L    | 0.12882247 | 0.03517498 | 0.09904473 | 4.45758538 |
| 10630  | PDPN      | 0.1403172  | 0.03582549 | 0.85276611 | 4.4024386  |
| 22924  | MAPRE3    | 0.33511753 | 0.03590508 | 0.96108037 | 4.38854251 |
| 814    | CAMK4     | 0.25421051 | 0.03687624 | 0.18850836 | 4.35094025 |
| 56341  | PRMT8     | 0.26180407 | 0.03784767 | 0.24563647 | 4.33298134 |
| 2185   | PTK2B     | 0.22936735 | 0.03769598 | 0.81305992 | 4.31030049 |
| 57628  | DPP10     | -0.1453427 | 0.03919809 | 0.49761501 | 4.28797137 |
| 4318   | MMP9      | 0.10371612 | 0.03879877 | 0.93105544 | 4.28527375 |
| 9922   | IQSEC1    | 0.25302527 | 0.03862211 | 0.51462114 | 4.28119699 |
| 83857  | TMTC1     | 0.25013919 | 0.03955209 | 0.47509474 | 4.23968056 |
| 5355   | PLP2      | 0.17144537 | 0.03963507 | 0.83510101 | 4.2243656  |
| 7205   | TRIP6     | 0.22711431 | 0.04086105 | 0.75767434 | 4.21820589 |
| 23154  | NCDN      | 0.21413767 | 0.04160179 | 0.8644598  | 4.12730236 |
| 6142   | RPL18A    | -0.2227203 | 0.04330387 | 0.56853763 | 4.10248649 |
| 9750   | RIPOR2    | 0.20848524 | 0.04344265 | 0.30029558 | 4.09332064 |
| 57574  | Mar-04    | 0.17734965 | 0.04407092 | 0.61287911 | 4.07210509 |
| 55332  | DRAM1     | 0.23556418 | 0.04471646 | 0.34827487 | 4.05238481 |
| 8871   | SYNJ2     | 0.18846823 | 0.04446732 | 0.68197923 | 4.05197494 |
| 8324   | FZD7      | 0.15437289 | 0.04476755 | 0.47130151 | 4.04457652 |
| 118429 | ANTXR2    | 0.25285991 | 0.04438733 | 0.1873521  | 4.03868121 |
| 2051   | EPHB6     | 0.14600222 | 0.04480247 | 0.62618333 | 4.03614141 |
| 55653  | BCAS4     | 0.38891023 | 0.04479445 | 0.46771734 | 4.03002857 |
| 5351   | PLOD1     | 0.24615539 | 0.04504525 | 0.77874007 | 4.02243935 |
| 25818  | KLK5      | 0.41046103 | 0.04734203 | 0.62604299 | 4.01327959 |
| 55603  | TENT5A    | 0.20553525 | 0.04564648 | 0.94414432 | 3.97900897 |

|        |           |            |            |            |            |
|--------|-----------|------------|------------|------------|------------|
| 80212  | CCDC92    | 0.4116828  | 0.04653768 | 0.45473277 | 3.95090659 |
| 399668 | SMIM10L2A | 0.21065363 | 0.04849151 | 0.61858737 | 3.89990432 |
| 2039   | DMTN      | 0.17196923 | 0.04867008 | 0.61719247 | 3.88373089 |
| 23504  | RIMBP2    | 0.19140243 | 0.04967572 | 0.829056   | 3.86603285 |
| 283638 | CEP170B   | 0.19658635 | 0.04980987 | 0.6567976  | 3.83675836 |

---
